# Supplementary material
Source: PubMed Central journal article supplement (PMC4320263)
Supplement: mmc1.pdf [file mmc1.pdf]

The American Journal of Human Genetics

Supplemental Data

## **A Specific *IFIH1* Gain-of-Function Mutation**

### **Causes Singleton-Merten Syndrome**

**Frank Rutsch, Mary MacDougall, Changming Lu, Insa Buers, Olga Mamaeva, Yvonne Nitschke, Gillian I. Rice, Heidi Erlandsen, Hans Gerd Kehl, Holger Thiele, Peter Nürnberg, Wolfgang Höhne, Yanick J. Crow, Annette Feigenbaum, and Raoul C. Hennekam**

**Table S1.** Whole exome sequencing: filtering criteria and output.

| Family | Filter criteria                                                                                                                                                                                                                                                                                                                                                                    | Variants/Genes                                                                                                                                                                                                                                                                                                                                                                                                                                                                                                                                                                                                                                                               |
|--------|------------------------------------------------------------------------------------------------------------------------------------------------------------------------------------------------------------------------------------------------------------------------------------------------------------------------------------------------------------------------------------|------------------------------------------------------------------------------------------------------------------------------------------------------------------------------------------------------------------------------------------------------------------------------------------------------------------------------------------------------------------------------------------------------------------------------------------------------------------------------------------------------------------------------------------------------------------------------------------------------------------------------------------------------------------------------|
| 1+2+3  | Basic filtering for all families: coverage>6; phred scaled variant quality score>10; allele read frequency>30%; VQSLOD score>2; minor allele frequency (EVP+1000genomes) <0.25%; minor allele frequency (in-house,N=511)<2%; variants on enrichment target+100bp; protein coding genes; RVIS score<95%; predicted change in protein sequence or major effects on core splice sites | Not documented                                                                                                                                                                                                                                                                                                                                                                                                                                                                                                                                                                                                                                                               |
| 1      | shared by affected patients (2)                                                                                                                                                                                                                                                                                                                                                    | ADAM33, APOA5, ARHGAP39, ATL2, ATR, AXDND1, BOK, BSN, C16orf74, C3orf23, C3orf62, CAPN3, CCDC83, CEACAM4, CFI, CILP, CLK4, COL1A1, COL23A1, CSNK1A1L, CYP2E1, CYR61, DAPK2, DEPDC5, DHX29, DHX34, DLC1, DNAH2, DUSP15, EFR3B, ENKUR, EPC2, FAM178B, FBXO16, FCHO2, FREM2, HELB, <b>IFIH1:p.R822Q</b> , IL6ST, INSR, IP6K1, IRAK4, ITGA1, ITGA9, ITPKB, JARID2, KBTBD12, KCNK1, LONP1, LRRFIP2, MMAB, NAT6, NBAS, NEB, OBSCN, P2RY11, PFAS, PHTF2, PKHD1, PLEC, PLEKHG3, PPAN, PPAN-P2RY11, RASA2, SDSL, SEMA5A, SLC35D1, SLC43A2, SLC6A16, SLCO1B1, SLCO3A1, SPHKAP, SPTBN2, TAF6, TET3, TMEM41B, TRAPPC6A, TXNDC16, WARS, WARS2, WDR12, WNK1, ZFHX4, ZNF485, ZNF497, ZNF696 |
| 2      | shared by affected patients (2) while absent in unaffected family members (2)                                                                                                                                                                                                                                                                                                      | A2M, ABCA7, ANO2, ASB10, CPE, DTNA, <b>IFIH1:p.R822Q</b> , KARS, KCNH8, KIAA0947, LARP4B, MTRR, NUMB, PRB4, RPE65, SH3TC2, SLC4A3, TRAF3IP1, TTLL5, ZNF749                                                                                                                                                                                                                                                                                                                                                                                                                                                                                                                   |
| 3      | <i>de novo</i> mutations in the affected patient                                                                                                                                                                                                                                                                                                                                   | c.308-1G>A in <i>SPECC1L</i><br>c.2465G>A (p.R822Q) in <b>IFIH1</b>                                                                                                                                                                                                                                                                                                                                                                                                                                                                                                                                                                                                          |

**Table S2.** Primer sets used in this study

|                  | Forward primer (5' to 3')                   | Reverse primer (5' to 3')                   |
|------------------|---------------------------------------------|---------------------------------------------|
| *IFN $\beta$     | ATTGCTCTCCTGTTGTGCTT                        | TCTCCTCAGGGATGTCAAAGT                       |
| *MDA5            | GGGCATGGAGAATAACTCA                         | TGCCCATGTTGCTGTTATGT                        |
| *IFI27           | ACTCCTCCAATCACAACTGTAG                      | CCTCTGCTCTCACCTCATCA                        |
| *IFI44L          | TCGTATTTGTTGAACCAGGGA                       | GCGAAGATTCAGTGGATGAAAG                      |
| *IFIT1           | GCTCCAGACTATCCTTGACCT                       | CCACAAGACAGAATAGCCAGAT                      |
| *ISG15           | GCCTTCAGCTCTGACACC                          | CGAACTCATCTTTGCCAGTACA                      |
| *RSAD2           | GFCACAGGAGATAGCGAGAATG                      | CGTGAGCATCGTGAGCAAT                         |
| *IGLEC1          | TGCTACTGCCTGTCCTTC                          | CAAGTGCTCAGCCACCAA                          |
| *GAPDH           | AGGTCCGAGTCAACGGATTTG                       | TGTAAACCATGTAGTTGAGGTCA                     |
| @human-MDA5      | AAAGGATCCATGTGGAATGGGTATTCCACAGAC           | GATCTCGAGCTAATCCTCATCACTAAATAAACAGCA        |
| #human-MDA5- MUT | ATGGTCCAGGCCCGTGGTCAA<br>GCCAGAGCTGATGAGAGC | GCTCTCATCAGCTCTGGCTTG<br>ACCACGGGCCTGGACCAT |

Note: \*primer sets were designed to quantitatively amplify the indicated genes; @ primer sets were used to clone the indicated genes; #primer sets were used to generate single nucleotide mutation. Restriction enzyme sites in primers were underlined.
